# Supplementary material
Source: Springer Nature journal article supplement (https://www.springermedizin.de/resource/supplementary/13256_2012_2578_MOESM7_ESM.pdf/9649986)

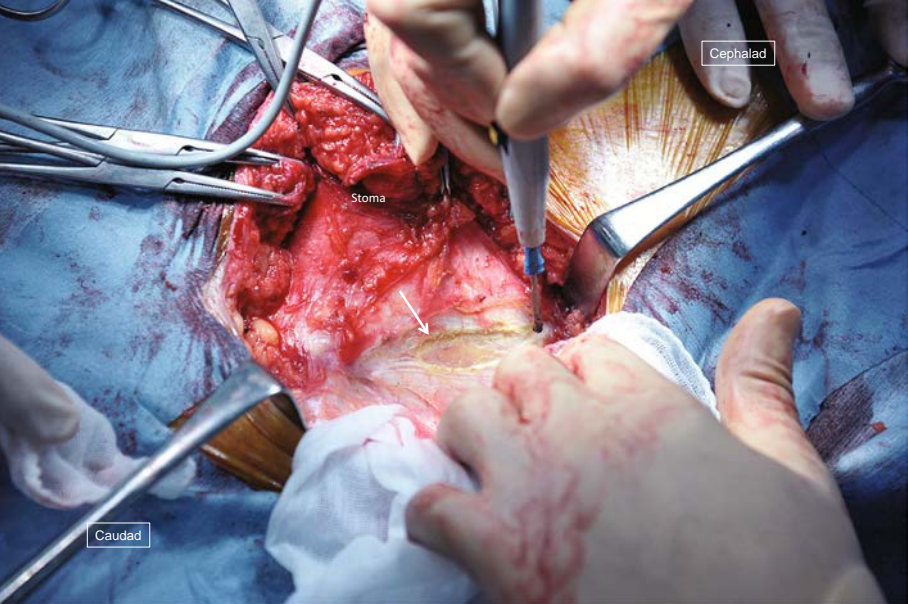

Cephalad

Stoma

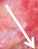

Caudad

Supplement: MOESM7 [file 9649986]
